# Supplementary material
Source: PubMed Central journal article supplement (PMC3461925)
Supplement: JCI64413sd.pdf [file JCI64413sd.pdf]

# Supplementary Figure 1A

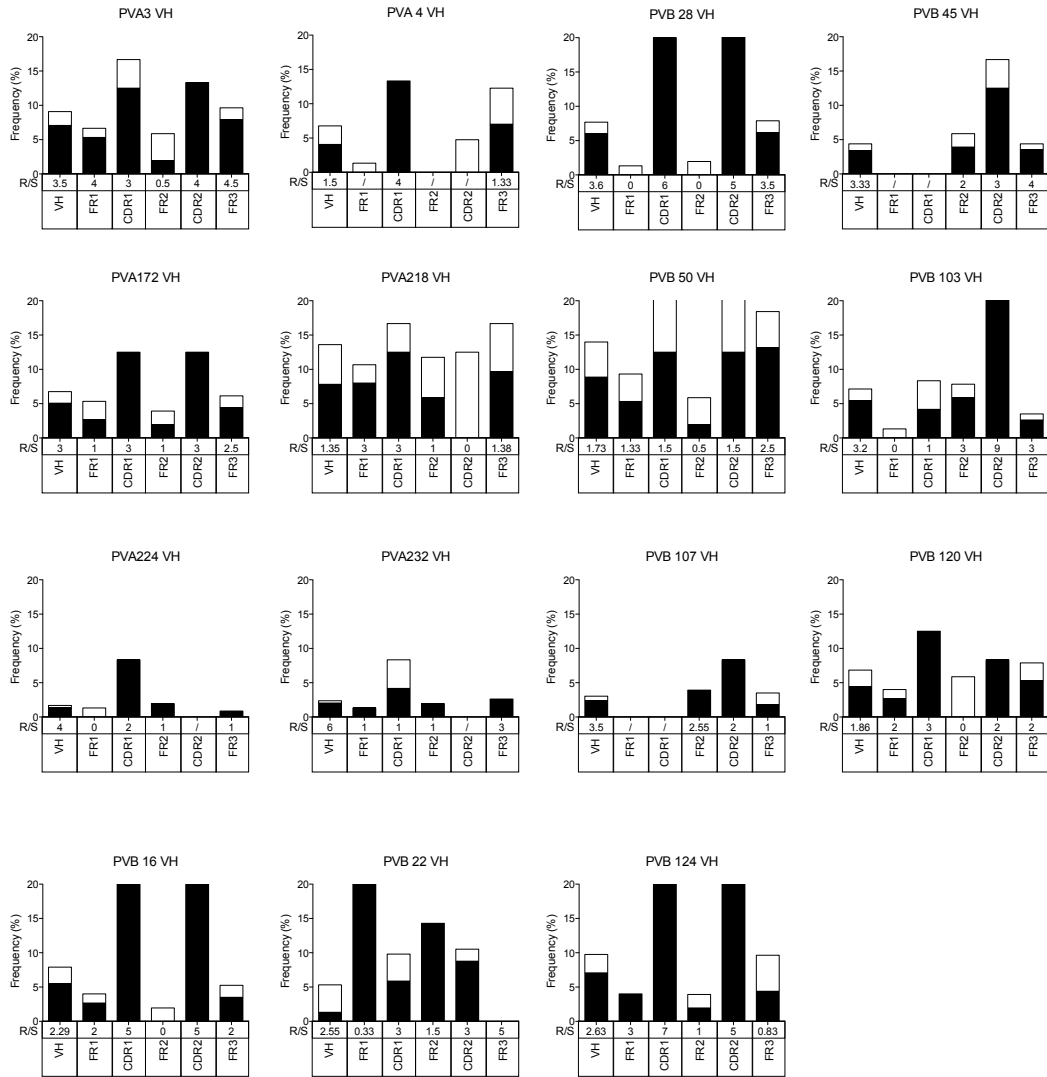

# Supplementary Figure 1B

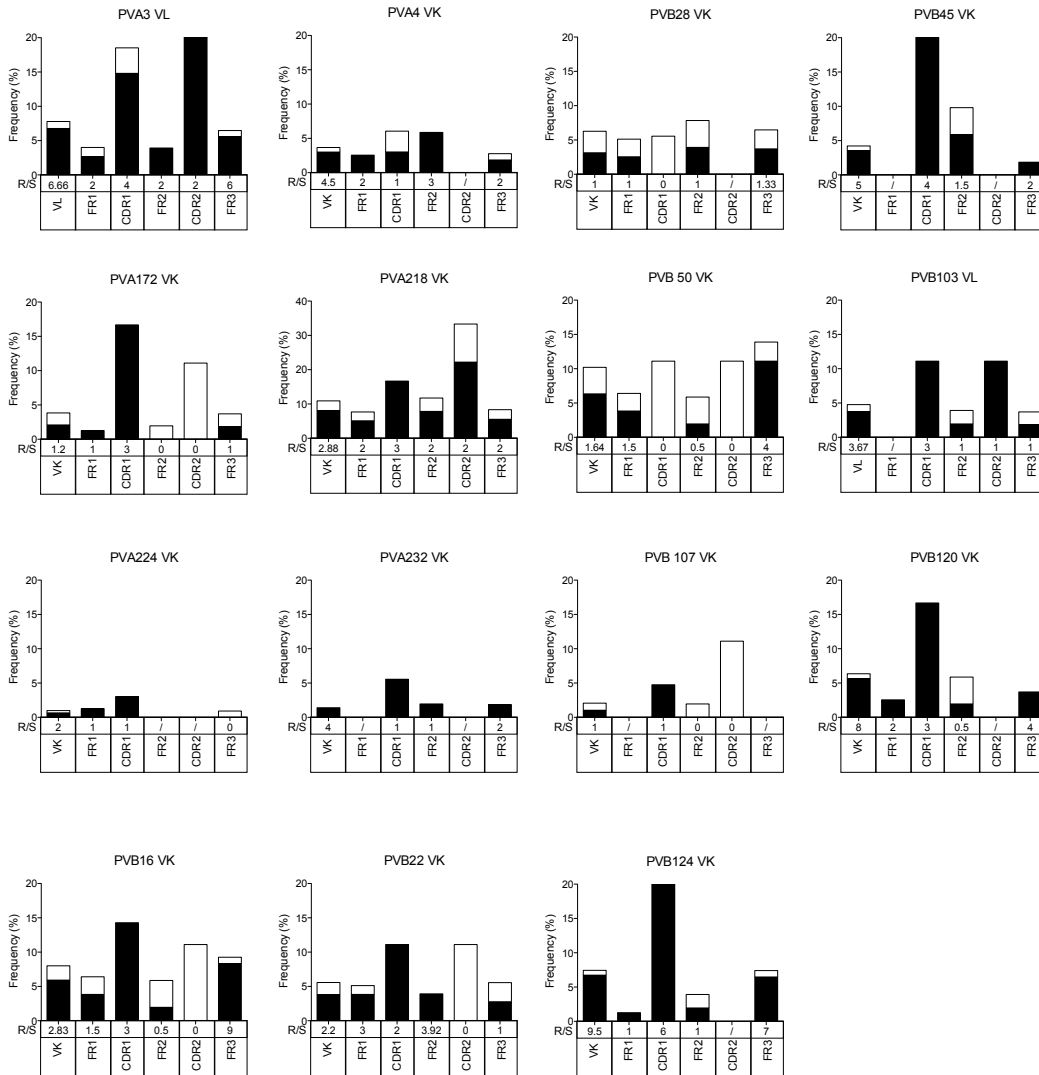

## Supplementary Figure 2

20  
!

AK23 - MOUSE - a r g - - - - - g y **d** g y - p - - - **W**GQ  
PV1 - VH3-7 - a - - s g - g - - - v v **d** f - - - - d h **W**GQ  
PV1 - VH1-46 - a r d - - - - - r q g f **d** l d - v - - - **W**GQ  
PF2 (F24-9) - VH3-53 - a r d - - - - - l g g f **d** f d - y - - - **W**GQ  
PV1 (Px4-3) - VH1-69 - a r g - - - - - g **d** y s g **w** y - n f d y **W**GQ  
PF1 (PF1-8-15) - VH3-30 - a r d - - - - r v **e** g y v **w** g g - t f d h **W**GQ  
PVA3 - VH3-15 - t - - - - - l p a g t y l m - s - - - **W**GQ  
PVA4 - VH2-5 - a h r g g r - - - - - q l v g a - w f d p **W**GQ  
PVA172 - VH3-7 - v r d y r - h i e g v p a a g t - f e - y **W**GQ  
PVA218 - VH5a - a r h g g - s a y s s s d a f - d - - f **W**GQ  
PVA224 - VH3-48 - a r e s r - s - - - - y y y y f - g m d v **W**GQ  
PVA232 - VH3-23 - a k t i f - g - - - - v v n s c - - m d v **W**GQ  
PVB16 - VH4-4 - a r t r r - d g y s l v p d g y - y f d s **W**GQ  
PVB22 - VH4-39 - a r - - - - a a y s s g w - s f - d - - f **W**GQ  
PVB28 - VH4-39 - a r d - - - - - g a a g l y l e - k - - - **W**GQ  
PVB45 - VH3-11 - t r d y t v e m a s s g v e a t - p q n y **W**GQ  
PVB50 - VH1-18 - a r g g - - - - r g g y d y p d - a f d l **W**GQ  
PVB103 - VH3-23 - a k w - - - - - - - v v i p y - y f d s **W**GR  
PVB107 - VH3-23 - a r g r k v l m l r g v s g l w v p m d v **W**GK  
PVB120 - VH1-2 - a t s - - - - - - - r d s g g - y y n y **W**GQ  
PVB124 - VH4-39 - a r s d g - d - - - - y v e g w - y f d i **W**GR

## Supplementary Figure 3

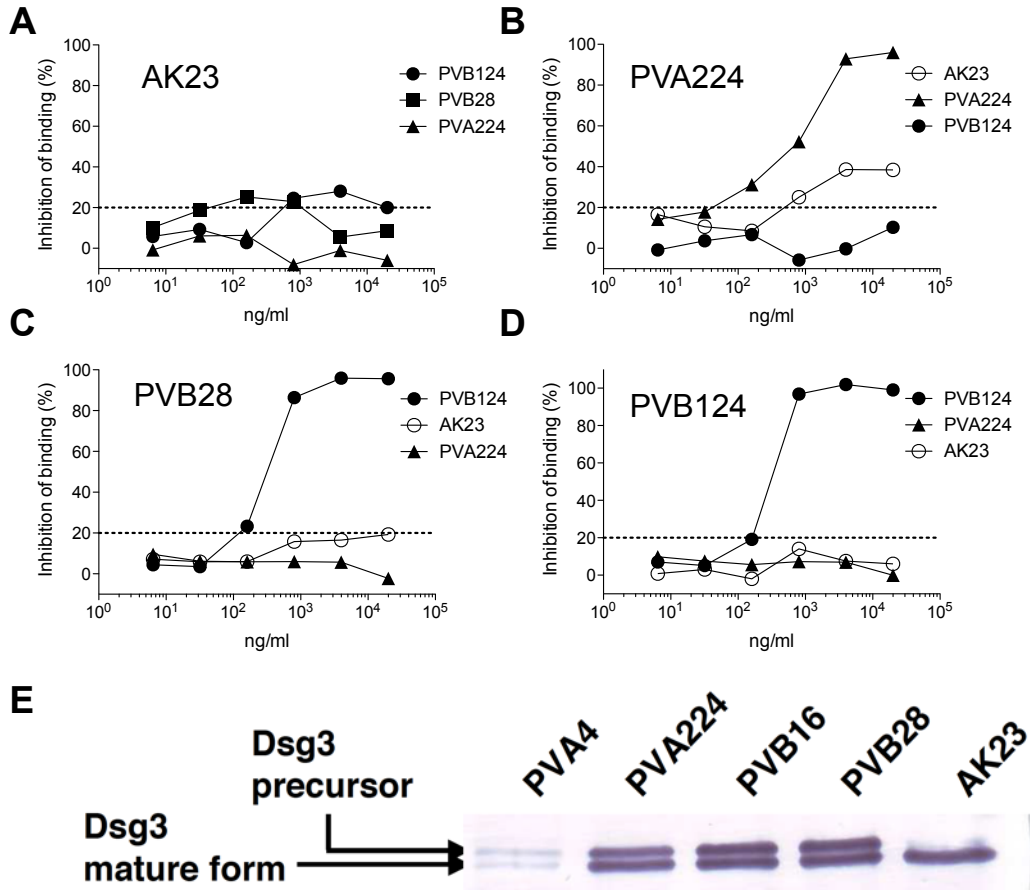

# Supplementary Figure 4

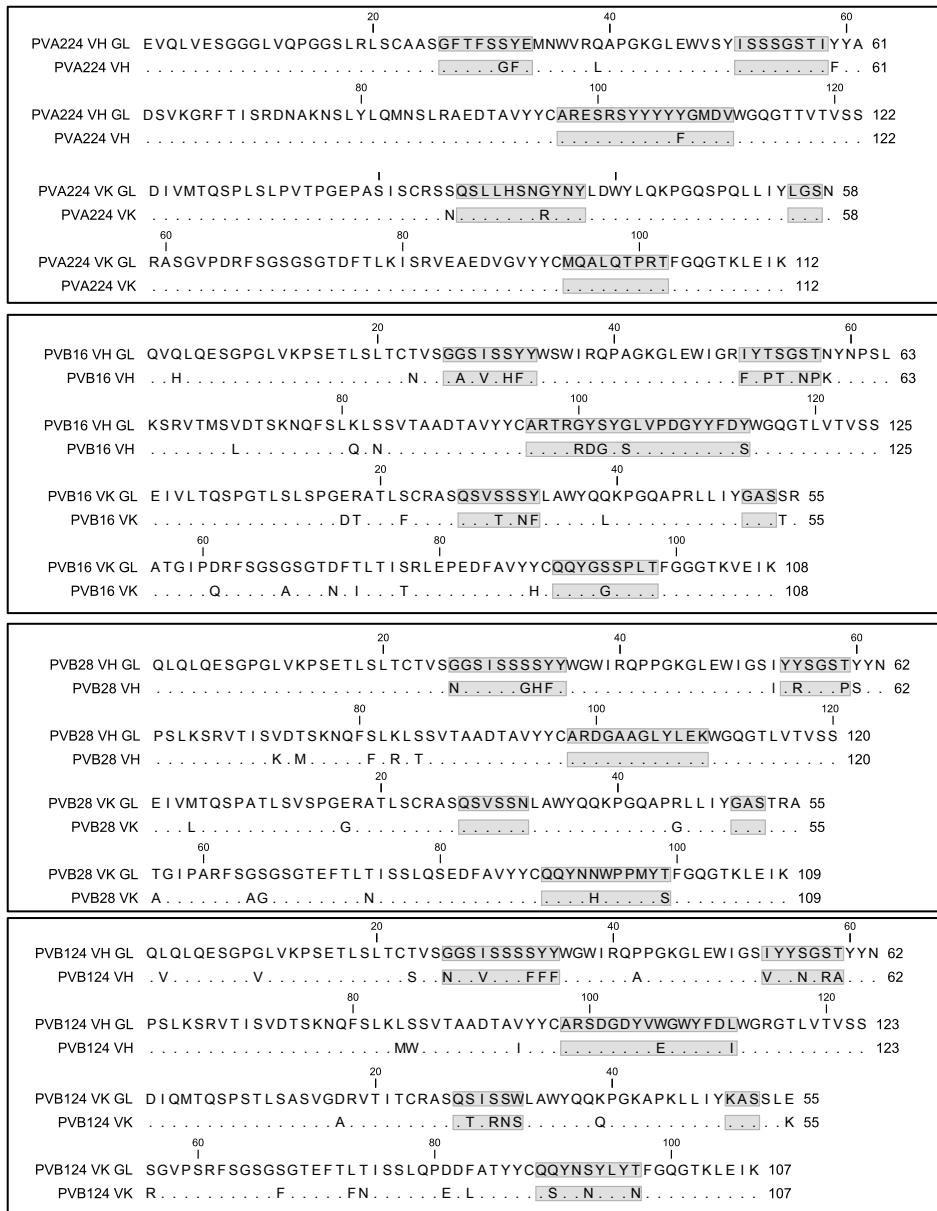

# Supplementary Figure 5

VH<sub>SM</sub>-VL<sub>SM</sub>

VH<sub>GL</sub>-VL<sub>GL</sub>

PVB28

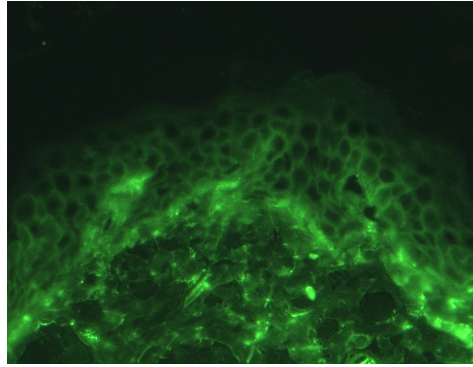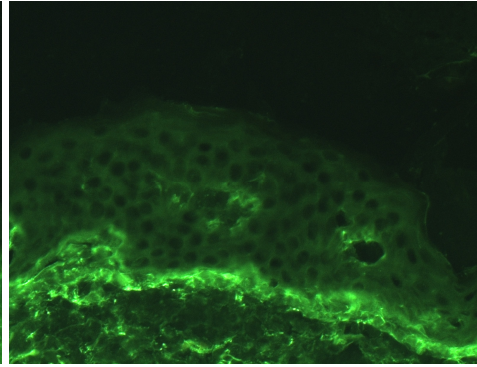

PVB16

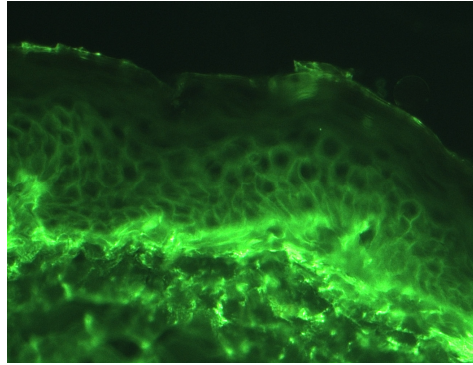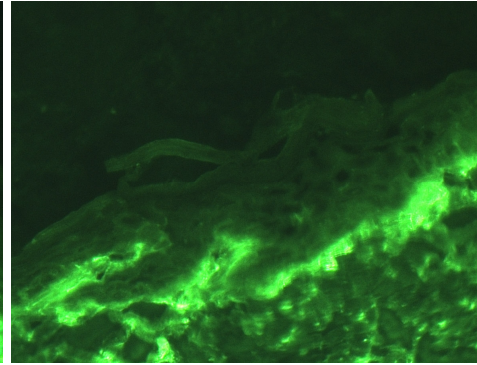

PVB124

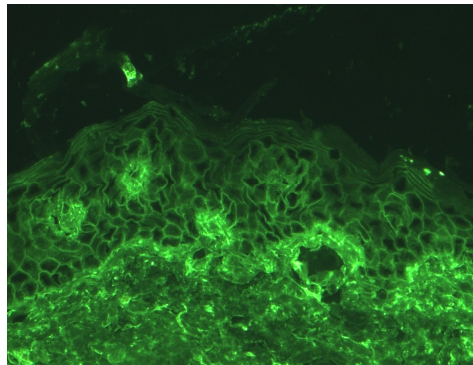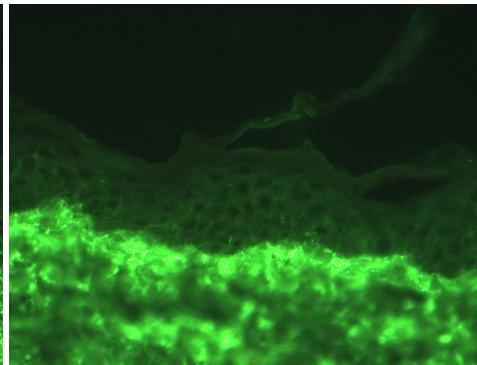

PVA224

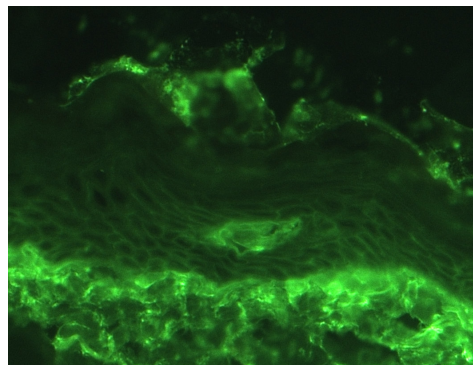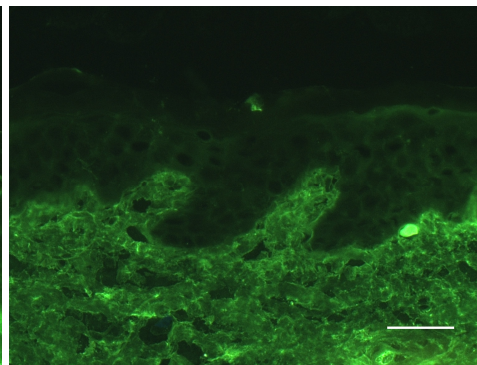

**Supplementary Table 1.** Analysis of VH and VK/VL gene segments using Focused binomial and Global binomial tests for determining antigenic selection using the tool available at <http://clip.med.yale.edu/selection> and described in reference 18 (Uduman et al Nuclein. Acid. Res. 2011)

|            | Observed Mutations |   |      |     |    |      | Expected |      |      |      | Focused test |           | Global test |          |
|------------|--------------------|---|------|-----|----|------|----------|------|------|------|--------------|-----------|-------------|----------|
|            | CDR                |   |      | FWR |    |      | CDR      |      | FWR  |      | P value      |           | P value     |          |
|            | R                  | S | R/S  | R   | S  | R/S  | R        | S    | R    | S    | CDR          | FWR       | CDR         | FWR      |
| PVA3 VH    | 6                  | 2 | 3    | 13  | 6  | 2.17 | 4.25     | 1.08 | 15.3 | 6.34 | 0.308        | -0.297    | 0.177       | -0.183   |
| PVA4 VH*   | 4                  | 1 | 4    | 8   | 7  | 1.14 | 2.99     | 0.86 | 11.8 | 4.34 | -0.409       | -0.0461   | 0.264       | -0.0419  |
| PVA172 VH  | 6                  | 0 | 6    | 7   | 6  | 1.17 | 3.09     | 0.84 | 10.8 | 4.24 | 0.193        | -0.136    | 0.0355      | -0.0383  |
| PVA218 VH* | 3                  | 4 | 0.75 | 16  | 17 | 0.94 | 6.57     | 1.74 | 23.7 | 8.02 | -0.00279     | -0.000113 | -0.0638     | -0.0068  |
| PVA224 VH  | 2                  | 0 | 2    | 2   | 1  | 2    | 0.96     | 0.2  | 2.77 | 1.07 | 0.202        | -0.473    | 0.117       | -0.244   |
| PVA232 VH  | 1                  | 1 | 1    | 5   | 0  | 5    | 1.19     | 0.33 | 3.87 | 1.61 | 0.365        | 0.193     | -0.423      | 0.195    |
| PVB16 VH   | 10                 | 2 | 5    | 6   | 4  | 1.5  | 3.67     | 0.97 | 12.2 | 5.16 | 0.0194       | -0.112    | 0.000149    | -0.0039  |
| PVB22 VH   | 9                  | 2 | 4.5  | 14  | 7  | 2    | 6.27     | 1.49 | 16.8 | 7.46 | 0.224        | -0.331    | 0.112       | -0.162   |
| PVB28 VH   | 10                 | 2 | 5    | 7   | 4  | 1.75 | 4.51     | 1.07 | 12.1 | 5.36 | 0.0417       | -0.195    | 0.00195     | -0.0173  |
| PVB45 VH   | 3                  | 1 | 3    | 6   | 2  | 3    | 2.18     | 0.52 | 6.71 | 2.59 | 0.33         | -0.457    | 0.269       | -0.34    |
| PVB50 VH*  | 5                  | 5 | 1    | 18  | 13 | 1.38 | 7.13     | 1.72 | 23.7 | 8.49 | -0.0294      | -0.00475  | -0.19       | -0.037   |
| PVB103 VH  | 9                  | 3 | 3    | 5   | 4  | 1.25 | 3.58     | 0.98 | 11.6 | 4.83 | 0.068        | -0.0331   | 0.000831    | -0.00185 |
| PVB107 VH  | 2                  | 0 | 2    | 4   | 2  | 2    | 1.36     | 0.37 | 4.42 | 1.84 | 0.313        | -0.5      | 0.275       | -0.382   |
| PVB120 VH  | 5                  | 0 | 5    | 6   | 9  | 0.67 | 2.87     | 0.92 | 11.9 | 4.28 | 0.495        | -0.00632  | 0.0873      | -0.00347 |
| PVB124 VH  | 12                 | 1 | 12   | 8   | 8  | 1    | 5.68     | 1.35 | 15.2 | 6.76 | 0.0688       | -0.0579   | 0.00156     | -0.00367 |
| PVA3 VL    | 6                  | 1 | 6    | 9   | 3  | 3    | 2.54     | 0.52 | 11.9 | 4.06 | 0.054        | -0.407    | 0.00984     | -0.0863  |
| PVA4 VL*   | 1                  | 1 | 1    | 7   | 1  | 7    | 1.39     | 0.39 | 6.08 | 2.14 | -0.47        | 0.318     | -0.361      | 0.275    |
| PVA172 VK  | 3                  | 1 | 3    | 3   | 3  | 1    | 1.04     | 0.3  | 6.4  | 2.25 | 0.21         | -0.0468   | 0.0215      | -0.0125  |
| PVA218 VK  | 5                  | 1 | 5    | 12  | 9  | 1.33 | 2.51     | 0.69 | 17.6 | 6.24 | 0.277        | -0.0369   | 0.0494      | -0.0124  |
| PVA224 VK  | 1                  | 0 | 1    | 1   | 1  | 1    | 0.42     | 0.12 | 1.82 | 0.64 | 0.333        | -0.261    | 0.165       | -0.165   |
| PVA232 VK  | 1                  | 0 | 1    | 3   | 0  | 3    | 0.4      | 0.12 | 2.6  | 0.88 | 0.0562       | 0.141     | 0.157       | 0.338    |
| PVB16 VK*  | 3                  | 1 | 3    | 12  | 6  | 2    | 2.63     | 0.76 | 13.6 | 5.01 | -0.465       | -0.249    | 0.403       | -0.24    |
| PVB22 VK   | 2                  | 1 | 2    | 8   | 4  | 2    | 1.49     | 0.44 | 9.76 | 3.32 | 0.496        | -0.195    | 0.329       | -0.17    |
| PVB28 VK*  | 0                  | 1 | 0    | 7   | 8  | 0.88 | 1.59     | 0.47 | 10.4 | 3.54 | -0.0294      | -0.00549  | -0.0921     | -0.0369  |
| PVB45 VK   | 4                  | 0 | 4    | 5   | 2  | 2.5  | 1.2      | 0.3  | 7.01 | 2.5  | 0.0248       | -0.499    | 0.00331     | -0.104   |
| PVB50 VK*  | 0                  | 3 | 0    | 13  | 10 | 1.3  | 2.42     | 0.66 | 16.9 | 6.01 | -0.015       | -0.00698  | -0.0513     | -0.0538  |
| PVB103 VL  | 4                  | 0 | 4    | 3   | 3  | 1    | 1.34     | 0.27 | 6.25 | 2.14 | 0.118        | -0.113    | 0.00667     | -0.0168  |
| PVB107 VK§ | 1                  | 1 | 1    | 0   | 1  | 0    | 0.36     | 0.1  | 1.86 | 0.68 | 0.47         | -0.0149   | 0.126       | -0.0137  |
| PVB120 VK  | 3                  | 0 | 3    | 7   | 2  | 3.5  | 1.25     | 0.36 | 7.68 | 2.71 | 0.0633       | 0.338     | 0.0495      | -0.341   |
| PVB124 VK  | 5                  | 1 | 5    | 9   | 2  | 4.5  | 1.92     | 0.43 | 10.8 | 3.88 | 0.0259       | 0.392     | 0.009       | -0.186   |

The colors indicate the direction of selection:

Red indicates positive and green indicates negative selection

Dark colors indicate statistical significance (based on alpha cut-off value of 0.05), lighter colors indicate a trend of selection.

\*, negative selection in CDR according to the Focused test; §, 6 nucleotides insertion in LCDR1
